# Specific Receptor Usage in *Plasmodium falciparum* Cytoadherence Is Associated with Disease Outcome

Lucy B. Ochola<sup>1\*</sup>, Bethsheba R. Siddondo<sup>1</sup>, Harold Ocholla<sup>1</sup>, Siana Nkya<sup>3</sup>, Eva N. Kimani<sup>1</sup>, Thomas N. Williams<sup>1,6</sup>, Johnstone O. Makale<sup>1</sup>, Anne Liljander<sup>4</sup>, Britta C. Urban<sup>1,2</sup>, Pete C. Bull<sup>1,5</sup>, Tadge Szeszak<sup>2</sup>, Kevin Marsh<sup>1,5</sup>, Alister G. Craig<sup>2</sup>

**1** KEMRI/Wellcome Trust Research Programme, Centre for Geographic Medicine Research, Kilifi, Kenya, **2** Department of Molecular Parasitology, Liverpool School of Tropical Medicine, Liverpool, United Kingdom, **3** Muhimbili University of Health and Allied Sciences, Dar es Salaam, Tanzania, **4** Department of Medicine, Solna, Karolinska Institutet, Stockholm, Sweden, **5** Nuffield Department of Clinical Medicine, John Radcliffe Hospital, University of Oxford, Oxford, United Kingdom, **6** Department of Paediatrics, University of Oxford, Oxford, United Kingdom

## Abstract

Our understanding of the basis of severe disease in malaria is incomplete. It is clear that pathology is in part related to the pro-inflammatory nature of the host response but a number of other factors are also thought to be involved, including the interaction between infected erythrocytes and endothelium. This is a complex system involving several host receptors and a major parasite-derived variant antigen (PfEMP1) expressed on the surface of the infected erythrocyte membrane. Previous studies have suggested a role for ICAM-1 in the pathology of cerebral malaria, although these have been inconclusive. In this study we have examined the cytoadherence patterns of 101 patient isolates from varying clinical syndromes to CD36 and ICAM-1, and have used variant ICAM-1 proteins to further characterise this adhesive phenotype. Our results show that increased binding to CD36 is associated with uncomplicated malaria while ICAM-1 adhesion is raised in parasites from cerebral malaria cases.

**Citation:** Ochola LB, Siddondo BR, Ocholla H, Nkya S, Kimani EN, et al. (2011) Specific Receptor Usage in *Plasmodium falciparum* Cytoadherence Is Associated with Disease Outcome. PLoS ONE 6(3): e14741. doi:10.1371/journal.pone.0014741

**Editor:** Colin J. Sutherland, London School of Hygiene and Tropical Medicine, United Kingdom

**Received:** June 7, 2010; **Accepted:** January 7, 2011; **Published:** March 3, 2011

**Copyright:** © 2011 Ochola et al. This is an open-access article distributed under the terms of the Creative Commons Attribution License, which permits unrestricted use, distribution, and reproduction in any medium, provided the original author and source are credited.

**Funding:** This work was supported by the UK Medical Research Council (Research Grant 70959) and the Wellcome Trust (Research Grant 084535). The funders had no role in study design, data collection and analysis, decision to publish or preparation of the manuscript.

**Competing Interests:** The authors have declared that no competing interests exist.

\* E-mail: laochola@gmail.com

## Introduction

Infections by the human malaria parasite *Plasmodium falciparum* can lead to a range of severe outcomes including severe anaemia, organ failure, coma and eventually death. The sequestration of *P. falciparum* infected erythrocytes deep in micro-vasculature is implicated in malaria pathology [1–3]. To date 11 host receptors have been identified that mediate adhesion to endothelium including CD36 and ICAM-1 to which most clinical *P. falciparum* isolates adhere [4]. Binding to the endothelial receptor ICAM-1 has been associated with sequestration in brain vasculature [5] and showed a weak but not statistically significant association in one study with cerebral malaria (CM), while adhesion to CD36 showed no association [6]. Other adhesive phenotypes such as formation of rosettes [7–9] and the ability to bind receptors expressed on the placenta [10–12] have consistently shown strong associations with pathology. The parasite ligand responsible for binding, PfEMP1 (transcribed from the *var* gene family), contains motifs responsible for adhesion (Duffy Binding Like domains and cystein-rich interdomain regions [13–20]) to a range of host receptors including ICAM-1 [21]; CD36 [22,23] P-Selectin [24]; PECAM/CD31 [25]; CR1 [13]. As demonstrated in the field of pregnancy associated malaria, characterizing the molecular nature of these interactions is important in understanding the pathogenesis of the more severe forms of malaria, because it would potentially provide more information in the design of new methods of prevention and treatment [10,26–29].

Intercellular adhesion molecule 1 (ICAM-1) is a 90–115 kDa transmembrane glycoprotein expressed on a variety of cell types including endothelial cells [30]. Its expression *in vivo* is upregulated in response to a variety of inflammatory mediators including tumour necrosis factor (TNF) and interleukin-1 (IL-1). ICAM-1 is of interest because its expression on brain endothelium is up-regulated in severe malaria [1] and a natural polymorphism termed ICAM-1<sup>Kilifi</sup> affects disease severity in some parts of Africa [31,32]. This mutation involves a lysine to methionine substitution at position 29 and is present at a gene frequency of 30% in African populations [31–33]. Binding to ICAM-1 is not a simple phenotype and a number of laboratory-adapted parasite lines such as A4u, ItG, C24 and JDP8, show varying binding phenotypes under flow or static conditions. Tse and others in 2004, targeted amino acid residues within the ICAM-1 protein and introduced alanine mutations that resulted in 25 mutant proteins, including ICAM-1<sup>S22/A</sup>, in which serine at position 22 is replaced by alanine. This and earlier studies [34,35] revealed that A4u and ItG demonstrated differential binding abilities to ICAM-1<sup>Reference</sup>, ICAM-1<sup>Kilifi</sup> and ICAM-1<sup>S22/A</sup>. The laboratory line A4u binds moderately to ICAM-1 [36] with little stationary adhesion under flow whereas the main adhesive interactions were of the rolling type. ItG and JDP8 showed stronger stationary binding but significantly lower rolling under these conditions [34–37]. The laboratory line C24 on the other hand does not bind to ICAM-1. A4u, ItG and C24 bound to CD36 while JDP8 showed

significantly lower adhesion to this receptor. These variations in binding may be explained by the differential adhesion properties of the variant surface proteins (PfEMP1) expressed by each parasite line or the expression levels of PfEMP1.

CD36 is an 88 kDa integral membrane protein found on various host cells including endothelium, monocytes and platelets. This receptor has multiple functions that include platelet adhesion, non-opsonic phagocytic clearance of senescent or pathologically altered cellular structures by pattern recognition [38] and regulation of different metabolic pathways, membrane transport systems and immune responses in humans [39,40]. Almost all *P. falciparum* paediatric clinical isolates adhere to CD36 and no difference in CD36-binding of parasites from severe or uncomplicated parasites has been observed [6,41]. However, a recent paper has suggested that CD36 deficiency may protect against *falciparum* malarial anaemia [42] and pregnancy-associated *P. falciparum* isolates were found not to bind to CD36 [10,43].

Adhesion of *P. falciparum* laboratory lines or clinical isolates has been assessed using two techniques, namely static and laminar flow adhesion assays. The former measures immobilization of parasitized cells on proteins, while the latter attempts to mimic the physiological system allowing for measurements of the strength or avidity of the interaction between infected cells and endothelial receptors [44,45]. The majority of adhesion studies conducted so far have concentrated on adhesion of clinical isolates under static conditions, while here we consider the effect of flow and static conditions in parallel to give different information about ligand-receptor interactions. For example studies under static conditions, using ItG and JDP8 revealed that these parasites are high avidity ICAM-1 binders, when presented on TNF-activated HUVEC [36], but under laminar flow these parasites bound poorly. A4u showed the opposite effect to that observed with ItG and JDP8 and bound strongly under flow conditions. Our intention in using both types of assays for ICAM-1 binding is to take into account previous work with this receptor indicating that its role in adhesion is particularly associated with recruitment from flow [45].

Genetic polymorphisms of affected populations and the presence of specific *falciparum* genotypes can both modulate the impact of *falciparum* malaria infections in endemic areas. Mutations in the human genes ICAM-1, CD36 and globin genes have been associated with susceptibility to severe *falciparum* malaria [46–48], in some but not all populations. For example, the homozygous ICAM-1<sup>Kilifi</sup> has previously been shown to be associated with cerebral malaria in Kenya, while in Malawi, children with the same phenotype showed increased mortality (Turner, unpublished observations). Other studies in West Africa did not show any association [33] and a more recent study in Kilifi suggested that the effect of the ICAM-1<sup>Kilifi</sup> mutation is probably more important in infections other than malaria [48]. In addition, children homozygous for a mutation change of T to G in the CD36 gene at nucleotide position 188 in exon 10 [49] are protected against severe malarial anaemia and children carrying the sickle cell trait, HbS are protected against all forms of malaria disease [42,46,47,50–52].

We have analysed the role of polymorphic variants of ICAM-1 in severe *falciparum* malaria using static and flow based adhesion assays and CD36 in static assays only. Understanding the adhesion mechanisms of parasites will provide us with a better understanding of disease progression.

## Materials and Methods

### Ethics Statement

The proposal for this study was reviewed and passed as ethically acceptable by the Kenya Medical Research Institute and National

Ethical Review Board and the Oxford Tropical Medicine Research Ethics Committee (OXTREC). In addition, a fully informed written consent was obtained from parents/legal guardians of every child enrolled in the study.

### Collection and culture of *P. falciparum* clinical isolates

Parasite samples were collected between 2005 and 2009 from children attending Kilifi District Hospital, Kenya who had a primary diagnosis of *P. falciparum* malaria and from a cohort of children under active surveillance for acute malaria in the Junju area of Kilifi District in Kenya. The samples were collected before anti-malarial treatment was administered. Only children with a parasitaemia above 3% were included in the study as this level of parasitaemia is required for the adhesion assays. Taking advantage of an already established algorithm [53] that allocates a unique, anonymous identifier for selection and processing of patient blood samples, patients were chosen using the inclusion criteria shown below. Sample processing, adhesion assays and data analysis were performed using the unique identifier so that the origin and clinical details of the sample remained unknown until the study was completed. Children presenting with febrile illness and peripheral *P. falciparum* parasitaemia were included in this study.

Severe malaria defined as hospital admissions, was further divided into three categories namely: Cerebral Malaria (CM) with a Blantyre Coma Score (BCS) of  $\leq 2$  [54,55], Severe malaria anaemia (SMA) had a haemoglobin concentration  $< 5$ g per deciliter, [56] and Severe malaria-other (SM-other) patients with neither severe anaemia nor cerebral malaria (BCS $> 2$ ). Lastly, patients recruited from peripheral dispensaries with no severe complications were termed Non-severe malaria (Uncomplicated, UM) [55–58].

167 patient samples were entered into the study, consisting of 85 frozen and 82 fresh isolates. 66 frozen isolates failed to meet the requirements of the adhesion assays (either through failure to grow or insufficient material recovered for the binding assays) giving a total of 101 isolates that were investigated for their binding to ICAM-1 and CD36.

### Culture of parasites

*P. falciparum* lines derived from the laboratory line IT4/25/5 [59,60], ITO4-A4u (A4u) and ItG, which have previously been selected for binding on ICAM-1, were used as controls. To minimize the effect of antigenic switching in culture, a batch of stabilites, selected on a variant specific monoclonal antibody BC6 (A4u) and by repeated selection on ICAM-1 (ItG) were serially thawed and maintained in culture for not more than three weeks.

Parasites were prepared as previously described [58] from acute samples. In brief, RBCs were purified from mononuclear cells and granulocytes using lymphoprep and Plasmion, respectively. Parasites were grown to maturity for 24 to 48 hours either from frozen (n = 19) or fresh (n = 82) isolates.

Laboratory parasite lines and parasites from patient isolates were cultured from pre-treatment blood samples at 2% hematocrit in O<sup>+</sup> human erythrocytes using standard culturing techniques, [61] using RPMI 1640 medium (supplemented with 37.5 mM HEPES, 7 mM D-glucose, 6 mM NaOH, 25  $\mu$ g of gentamicin sulfate/ml, 2 mM L-glutamine, and 10% human serum) at a pH of 7.2 in a gas mixture of 96% nitrogen, 3% carbon dioxide, and 1% oxygen. The parasite density was calculated by determination of the number of parasites per 200 white blood cells (WBC) for thick blood film or 500 red blood cells (RBC) for thin blood films. Baseline WBC or RBC counts were used to calculate the parasitaemia (parasites/ $\mu$ l). For all adhesion assays the parasitae-

mia was adjusted to 3% and 1% hematocrit (approximately 30000 parasites/ $\mu\text{l}$ , based on an estimation of  $10^9$  RBCs/100 $\mu\text{l}$ ).

### Recombinant proteins

Purified receptors used in this study were CD36 (R & D Systems, UK), ICAM-1-Fc reference (the wild type allele of ICAM-1 (ICAM-1<sup>Reference</sup>)) [37], ICAM-1 Kilifi (ICAM-1<sup>Kilifi</sup>) [16,38] and ICAM-1 S22/A (ICAM-1<sup>S22/A</sup>) [62].

### Static adhesion assays

Purified recombinant proteins were spotted in triplicate in a radial pattern using 2  $\mu\text{l}$  spots on 60 $\times$ 15 mm bacteriological plastic petri dishes (Falcon 1007; Becton Dickinson, Oxford, UK) at concentrations of 50  $\mu\text{g}/\text{ml}$  for ICAM-1 and CD36 proteins. These concentrations had previously been shown to be within the dynamic range for detecting differences in adhesion and produce coated surfaces with receptors at levels approximately equal to receptor densities seen on activated endothelium or basal levels of CD36 [36]. The dishes were placed in a humidified chamber for 2hrs at 37°C to allow the proteins to adsorb to the surface, after which the protein solutions were aspirated off and the uncoated plastic area blocked overnight with 1% BSA/PBS at 4°C. The plates were warmed at 37°C for one hour, blocking solution (1% BSA/PBS) removed and washed twice in binding buffer (RPMI 1640 in 2% glucose) prior to adding 1.25 ml of parasite cultures at 3% parasitaemia, which had been washed twice in binding buffer and resuspended to 1% haematocrit. The plates were incubated at 37°C for one hour with gentle resuspension every 10 minutes. Unbound infected and uninfected erythrocytes were removed by gentle manual washing (4–6 washes) with 1.5 ml binding medium (monitoring of adhered cells was performed using an inverted microscope). The adhered infected erythrocytes were fixed with 1% glutaraldehyde in phosphate buffered saline for 1 hour and stained with 10% giemsa for 15 minutes. Adhesion levels were quantified by microscopy using the unique, anonymous identifier (with the operator blinded to the clinical category) and results were expressed as the mean number of parasitized erythrocytes bound per  $\text{mm}^2$  of surface area.

### Flow adhesion assays

Using a modified method [36,44] microslides (Camlab, UK) were coated with ICAM-1 recombinant proteins at 50  $\mu\text{g}/\text{ml}$  at 4°C overnight followed by blocking with 1% BSA/PBS at 37°C for two hours. Microslides were connected to tubing mounted on a microscope stage (Nikon; Eclipse TE 200) enclosed within a plastic chamber that maintains the temperature at 37°C. Tubing was mounted to a system that allows medium to flow through at a controlled rate of 186  $\mu\text{l}/\text{minute}$  (0.05 Pa). Infected erythrocyte suspensions were passed over the slide for a total of 6 minutes followed by buffer flowed to remove any unbound cells (2 minutes). This flow rate mimics the flow rate in the microvasculature.

At the end of each 8 minute run, the total number of stationary infected erythrocytes was counted in six separate fields on each microslide with the buffer still running. Using one protein per microslide, all controls and clinical samples were run in duplicate in a single experiment.

### Patient and parasite genotypes

CD36, ICAM-1,  $\alpha$ -thalassaemia and sickle cell genotypes were determined in all patients using allele-specific polymerase chain reaction described elsewhere [31,33,49,63,64]. To determine the extent of mixed parasite populations a multi-plexed fluorescent

labeling system for genotyping MSP1 (subfamilies MAD20, K1, RO33) and MSP2 (subfamilies FC27 and IC) was used [65].

### Binding signatures for *P. falciparum* clinical isolates under static conditions

The larger dataset for static assays was available for further analysis of the ICAM-1-binding phenotype. The binding data of clinical isolates was converted into binding signatures by comparing their ICAM-1<sup>Kilifi</sup> and ICAM-1<sup>S22/A</sup> adhesion against that of ICAM-1<sup>Reference</sup> as the reference standard. This allowed us to subtype these isolates for ICAM-1 adhesion using a two-letter code based on relative binding to Kilifi and S22/A proteins respectively. The absolute binding values obtained were converted into percentage values relative to ICAM-1<sup>Reference</sup> binding and designated high binders 80–100% (binding signature ‘a’), moderate binders 50–79% (binding signature ‘b’) and low binders 0–49% (binding signature ‘c’) (see Table S1).

### Data Analysis

Statistical analysis was carried out using STATA (version 9.0) and Prism (version 5.0). Distributions were frequently highly skewed from normal so non-parametric tests of significance (e.g. Mann-Whitney) were applied.

## Results

### Study Population

From a total of 167 blood samples screened for parasite growth and recovery only 101 were used for adhesion studies. Previous studies used frozen ring stage parasites for adhesion assays [6], but in our study, these frequently failed to grow or did not achieve the required parasitaemia of  $\geq 30,000/\mu\text{l}$  required for accurate assessment of binding to different ICAM-1 variants (Figure 1). In addition, other studies [41,66], including some recently published data [67], have suggested that significant phenotypic changes in *var* expression may take place on freezing and thawing particularly if parasite cultures are grown *in vitro* for 5–6 cycles. Isolates in this study were grown for a single cycle and because most frozen isolates failed to grow (only 19 out of a total of 66 attempted) we resorted to using fresh isolates ( $n=82$ ), to give a total of 101 isolates that were analysed for adhesion (Figure 1). The growth characteristics for isolates from both UM and severe malaria cases were similar.

Out of the 101 children, 45 had uncomplicated malaria, while 56 had severe malaria. Children with severe disease (SMA, CM and severe malaria-other) had a median age of 4 years (interquartile range 3–6 years) and those with uncomplicated malaria had a median age of 5 years (interquartile range 4–6 years). All children were free of other secondary infections and were split into different clinical groups as shown in Table 1. We observed that children with severe malaria-other had a high median parasitaemia of 582120 parasites/ $\mu\text{l}$  (interquartile range 194140–739405), followed by children with CM (median 457420, interquartile range 230880–630450) and those with SMA and uncomplicated malaria had a lower median parasitaemia of 228000 and 235000, respectively (Table 1). The parasites that grew to trophozoite stage were assessed for adhesion under static and flow conditions, although in some cases the sample volume was limited and static adhesion alone was carried out (Figure 1). Cases of SMA were infrequent in this population ( $n=8$ ) and only one patient had both cerebral malaria and a haemoglobin (Hb) of less than 5 g/dl. This patient was considered in both the CM and SMA arm.

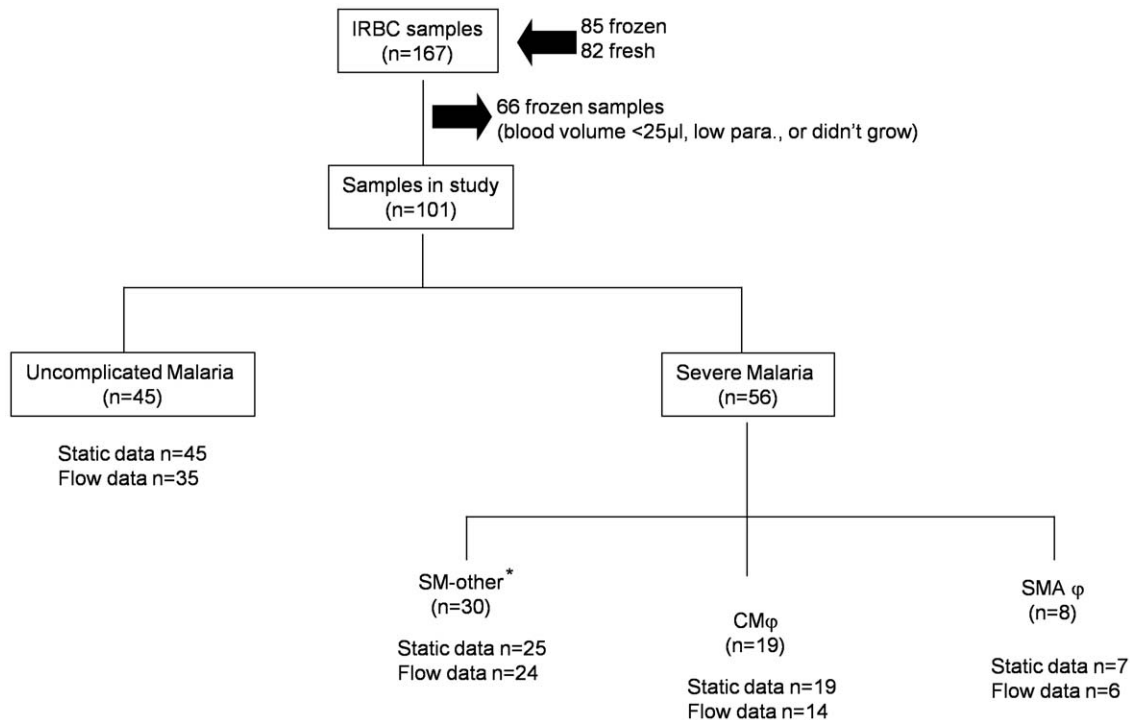

**Figure 1. Distribution of clinical samples used in the study.** Scheme showing the collection and classification of infected blood samples from children with different malaria syndromes: uncomplicated (UM), severe malaria other (SM other); cerebral malaria (CM); severe malaria anaemia (SMA). The following symbols designate: \* severe malaria but no CM or anaemia; φ one patient had an Hb<5g/dl and CM; n = number of clinical samples; low para, low parasitaemia  
doi:10.1371/journal.pone.0014741.g001

### Effect of clinical syndromes on adhesion

In this study, we observed that 80% of clinical isolates bound to both CD36 and ICAM-1 (Table S2). As with previous findings [6], children with an Hb of <5 g/dl showed reduced adhesion under static conditions (Figure 2a). For static conditions, we have shown significantly higher binding to CD36 by UM isolates [mean adhesion 1177.2 parasites/mm<sup>2</sup> (95% confidence interval (CI), 829.0–1525.3)] compared to CM isolates [mean adhesion 502.3 parasites/mm<sup>2</sup> (95% CI, 179.6–825.0) ( $p = 0.016$ , Mann-Whitney test)] and SMA isolates [mean adhesion 158.5 (95% CI -38.4–355.4) ( $p = 0.006$ , Mann-Whitney test)]. Intermediate significance was observed when UM cases were compared to children with SM-other [mean adhesion 645.0 (95% CI, 370.6–919.4)] to CD36 under static conditions ( $p = 0.050$ , Mann-Whitney test). Children below one year admitted with severe disease, irrespective of the clinical syndrome, showed reduced levels of adhesion to all three

ICAM-1 protein variants and CD36 under static and flow conditions, but numbers were too few ( $n = 8$ ) to test for significance.

We did not observe differences in binding densities to ICAM-1 protein variants under stationary adhesion conditions. Under flow conditions, however, CM cases (accounting for 30% of total number of children recruited) showed the highest adhesion under flow conditions. Mean adhesion under flow to ICAM-1<sup>Reference</sup> for CM was 158.0 parasites/mm<sup>2</sup> (95% CI, 63.6–252.4), for SMA 52.8 parasites/mm<sup>2</sup> (95% CI, -8.7–114.3), SM-other 42.8 parasites/mm<sup>2</sup> (95% CI, 13.0–72.6) and UM 48.7 parasites/mm<sup>2</sup> (95% CI, 21.9–75.5) (Figure 2b). Binding densities to ICAM-1<sup>Reference</sup> were significantly higher for CM isolates than for isolates from children with UM or SM-other (Figure 2b), under flow conditions ( $p = 0.009$  and 0.012 respectively, Mann-Whitney).

**Table 1.** Clinical samples included in the study and classified into different severity groups.

| Severity group        | Clinical status                       | n  | Parasite count (per/µl) | Median age (yr) |
|-----------------------|---------------------------------------|----|-------------------------|-----------------|
| Severe anaemia φ      | Hb<5 g/dl                             | 8  | 228000 (166870–255900)  | 2.5 (1.8–3.3)   |
| Cerebral malariaφ     | BCS≤2, prostrated unconscious         | 19 | 457420 (230880–630450)  | 3 (2–4)         |
| Severe malaria-other* | BCS>2                                 | 30 | 582120 (194140–739405)  | 3 (2–5)         |
| Uncomplicated malaria | Mild disease, no severe complications | 45 | 235000 (136300–385400)  | 5 (4–6)         |

Numbers in parentheses represent the interquartile ranges.

\*Severe malaria-other-severely ill children who did not meet the criteria for severe anaemia or cerebral malaria.

φ 1 patient had both CM and anaemia.

doi:10.1371/journal.pone.0014741.t001

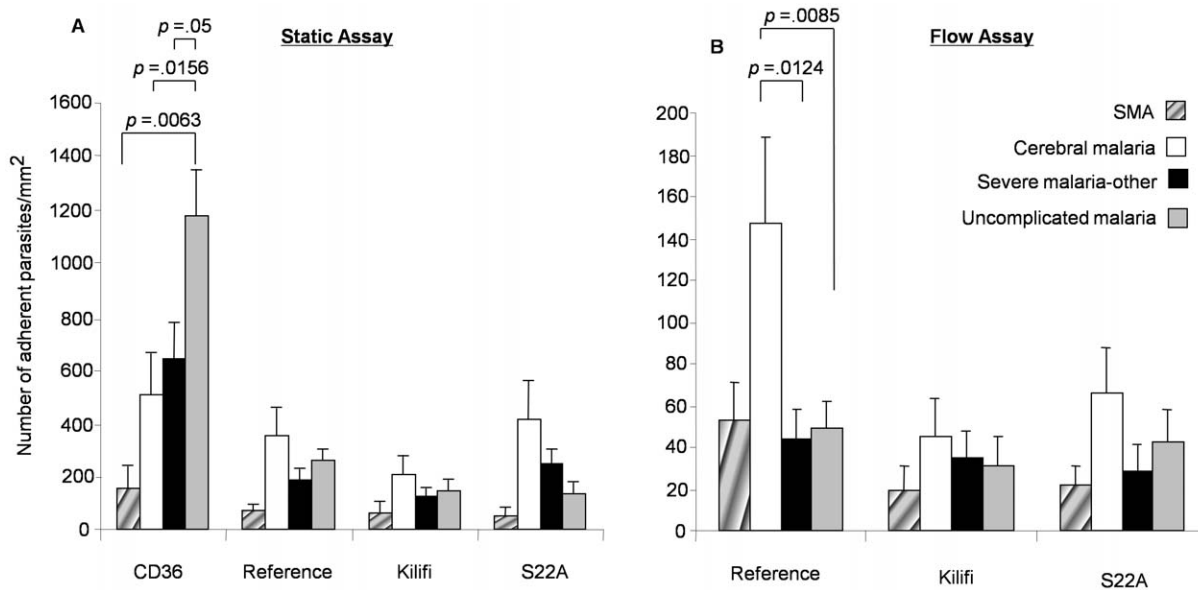

**Figure 2. Mean adhesion of clinical isolates to CD36 and ICAM-1 proteins.** Experiments were performed under static (a) and flow (b) conditions at coating concentrations for CD36 and ICAM-1 proteins of 50  $\mu\text{g/ml}$ . Data represent the mean number of adherent parasites per  $\text{mm}^2 \pm$  standard error. p values that describe significant associations are shown. doi:10.1371/journal.pone.0014741.g002

### Association of host or parasite genotypes with adhesion

There was no significant difference in the mean cytoadherence values or clinical syndromes between isolates from patients with different  $\alpha$ -Thalassemia, ICAM-1, CD36 genotypes and HbS, sickle cell genotypes (Table S3) or between patients with isolates with different MSP1/ MSP2 genotypes or numbers of circulating parasite genotypes. The majority of children had 2 circulating parasite genotypes and the mean number of parasite genotypes was greatest in CM cases and lowest in UM cases, although these differences were not statistically significant (Table 2). Among the 101 patients screened, we found that all were HbAA (normal haemoglobin) except for three UM cases that were HbAS, sickle trait carriers.

### Analysis of ICAM-1 binding signatures

Since a weak association between ICAM-1 binding and pathology has been suggested by previous work, further analysis of the binding phenotypes of clinical isolates for adhesion to ICAM-1 variant proteins was performed to develop a more detailed picture of the nature of this interaction (Figure 3 and

Table S1). Clinical isolates were found to exhibit differential binding densities to the three ICAM-1 protein variants Reference, Kilifi and S22/A. This allowed us to sub-type the binding to ICAM-1 into different categories, for example, A4u binds weakly to ICAM-1<sup>Kilifi</sup> and strongly to ICAM-1<sup>S22/A</sup> and when these were compared against ICAM-1<sup>Reference</sup> it gives a 'ca' type (c = low binding; a = strong binding). ItG on the other hand, gives a 'bc' type (b = moderate binding to Kilifi and c = low binding to S22/A when compared to Reference). Similarly clinical isolates display varying binding signatures when ICAM-1<sup>Reference</sup> is taken as the reference point (Table S1). Data analysis was performed using static data only. The number of isolates in Severe Malaria-other were  $n = 22$ , CM  $n = 13$  and UM  $n = 32$ . Isolates that gave no adhesion to ICAM-1 proteins were excluded from this analysis. Of the nine ICAM-1 binding signatures defined by this approach, only the "ca" type was more frequent among the severe malaria isolates than among the UM isolates, but this was not statistically significant (Odds Ratio 7.750 (95%CI 0.896–67.02)  $p = 0.056$ , two-tailed Fishers exact).

**Table 2. Association of clinical syndromes with MSP1 and MSP2 parasite genotypes.**

|                                       | Alleles | CM            | SMA           | SM-O          | UM            |
|---------------------------------------|---------|---------------|---------------|---------------|---------------|
| <b>MSP1</b>                           | MAD20   | 14.5          | 15.4          | 10.6          | 9.5           |
|                                       | K1      | 27.1          | 15.4          | 31.8          | 28.6          |
|                                       | RO33    | 10.4          | 23.1          | 7.6           | 23.8          |
| <b>MSP2</b>                           | FC27    | 16.7          | 15.4          | 24.2          | 23.8          |
|                                       | IC      | 31.3          | 30.8          | 25.8          | 14.2          |
| <b>Mean no. of genotypes (95% CI)</b> |         | 2.9 (2.5–3.2) | 2.2 (1.5–2.8) | 2.6 (2.1–3.0) | 2.6 (1.5–3.7) |

Data is presented as a % of respective genotypes in each clinical category.

CM, cerebral malaria; SMA, severe malarial anemia; UM, uncomplicated malaria; SM-O, severe malaria-other-severely ill children who did not meet the criteria for severe anemia, cerebral malaria.

doi:10.1371/journal.pone.0014741.t002

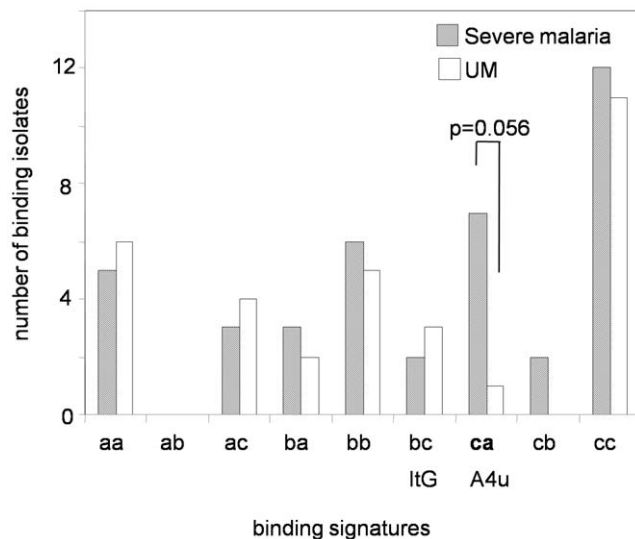

**Figure 3. Binding signatures for *P. falciparum* clinical isolates under static conditions.** Binding signatures calculated by comparing ICAM-1<sup>Kilifi</sup> and ICAM-1<sup>S22/A</sup> clinical binding data against that of ICAM-1<sup>Reference</sup> the reference standard. Data was calculated using adhesion to ICAM-1<sup>Reference</sup> as a standard against which relative adhesion to ICAM-1<sup>Kilifi</sup> and <sup>S22/A</sup> are calculated. a, designates strong (80–100%), b, moderate (50–79%) and c, low (0–49%) adhesion. The number of isolates with Severe malaria n = 35 and UM n = 32. doi:10.1371/journal.pone.0014741.g003

## Discussion

This current study assessed the adhesion of *P. falciparum* infected erythrocytes under flow (ICAM-1) and static (ICAM-1 and CD36) conditions from children with different clinical syndromes of malaria. *P. falciparum* isolates from children with UM have significantly higher levels of adhesion to CD36, under static conditions, than isolates from children with severe disease (CM, Severe Malaria-other and SMA). Previous studies had revealed that almost all isolates of *P. falciparum* adhere to CD36 [2,42,68,69] and in Africa no differences in CD36-binding ability between SM and UM cases were observed [6,25,41,70], although one study in Mali showed a positive association with a sub-type of PfEMP1 (*cys2var*) and severe malaria and this *var* type is part of a group of PfEMP1 proteins that tend to have lower binding to CD36 [71]. In adults in South East Asia, higher CD36 binding (using C32 cells) was observed among *P. falciparum* isolates from patients with severe (but not cerebral) malaria [72]. Most of these earlier studies used frozen parasite isolates and the sample sizes were relatively small. In our study, freshly grown parasite isolates have given some different patterns of association between binding and clinical phenotypes than the frozen ones used in the Newbold *et al* paper [6], although we did not have an asymptomatic group which was present in this latter study so care needs to be taken in making this comparison.

One potential weakness of this study is that bias may have been introduced by only analyzing parasites isolates with an *in vivo* parasitaemia that exceeds 30000/μl, but for adhesion based studies such parasitaemias are required to obtain accurate measurements. It is possible that this cut off may have resulted in the exclusion of SMA cases which often have parasitaemia below 30000/μl [73,74]. However this parasitaemia may also be an advantage in that the UM controls will be from patients with relatively high parasitaemia and so better matched to the CM isolates. A second potential weakness is that adhesion to CD36 was

not studied under laminar flow conditions as sample volumes were limiting, reducing the number of analyses possible. Data relating to *var* types of patients is not currently available but this work is in progress and forms part of a large study examining many factors of parasite biology (P. Bull, personal communication). This information once available may explain why we observed reduced adhesion in children below one year of age, based on the subset of PfEMP1 proteins observed in this category.

CD36 receptor is involved in non-opsonic phagocytosis of parasite infected erythrocytes by monocytes and macrophages [38,75,76] and in the uptake of antigens into dendritic cells, (DCs) [77,78]. Binding of infected erythrocytes to DCs modulates their maturation *in vitro* [76] leading to upregulation of IL-10 and down regulation of IL-12. This may in turn limit the production of inflammatory responses that are associated with severe clinical outcomes. The high levels of adhesion of UM cases to CD36 observed in this study suggest a role of this receptor in host control of parasitaemia, before antigen-specific immune responses occur and/or limitation of pro-inflammatory responses. This hypothesis is in contrast to the common view of CD36 as a receptor exploited by the parasite for the purpose of tissue sequestration.

The pathogenesis of severe *falciparum* malarial anaemia arises due to decreased production and increased destruction of erythrocytes [79,80]. Unlike high malaria transmission areas where severe malaria anaemia cases are common [81,82], the incidence of SMA has fallen dramatically in Kilifi district over the last ten years [83]. The reduction in adhesion observed in the SMA group was not due to the presence of polymorphisms such as sickle cell,  $\alpha$ -thalassaemia or CD36-deficiency as previously shown by other groups [42,51,84]. A modification in the surface membrane of erythrocytes leading to alterations in expression of surface host receptors CR1, CD55 and CD59 has previously been shown to occur in erythrocytes from SMA children [85], whether this affects PfEMP1 display remains to be determined but this could explain why isolates from these patients show reduced adhesion [30]. Furthermore, four SMA out of the eight were microcytic with a mean corpuscular volume (MCV) below normal range (data not shown) and one of these patients had respiratory distress. Despite MCV being below normal range, this did not explain reduced adhesion as values varied when compared between patients independent of MCV. It is also possible that SMA may lead to the selection of particular PfEMP1 variants, as seen in children with Hb-S and Hb-C, which could affect their adhesion characteristics (Fairhurst, pers. comm.). Further studies are needed to understand the molecular basis of this phenomenon.

Detectable binding of *P. falciparum* clinical isolates to ICAM-1 had previously been shown to have a prevalence of 80% in this population [6] and our study found similar levels (Table S2). Newbold and others [6] did not observe a significant association with CM but with malaria disease (CM and UM combined) when compared with asymptomatic infection. We found that binding to ICAM-1<sup>Reference</sup> is associated with CM, and levels of binding of isolates from patients with this clinical syndrome were found to be significantly higher than UM cases when using flow-based assays. Under flow, but not static conditions, ICAM-1 captures infected erythrocytes, suggesting that this process of capturing from flow is a critical one in the pathogenesis of CM. This is in agreement with previous findings that in some laboratory isolates ICAM-1 is important for efficient adhesion to HUVEC [36] and suggests a mechanism for severe disease based on preferential recruitment of specific adhesive types of parasites in the circulation to brain endothelium. This would also fit with other work, which showed that the adhesion of different parasite variants was not evenly distributed among tissues, but instead that accumulation of

parasites expressing particular *var*-types was organ-specific (including brain) [86].

ICAM-1 is also an attachment molecule for the major serotypes of human rhinovirus (HRV) that are responsible for localizing the virus near the cellular membrane and triggering conformational changes in the viral capsid that initiate uncoating and epithelial cell invasion [87]. Studies on human rhinovirus (HRV) using two different HRV serotypes have shown varying adhesion phenotypes to ICAM-1<sup>Reference</sup> and ICAM-1<sup>Kilifi</sup>, and their association with varying clinical outcome [88]. A similar situation may occur in *P. falciparum* variants from the field as shown in this study and in laboratory lines [63] that exhibit differential adhesion abilities to all three ICAM-1 proteins. When we tested patient isolates for their ability to bind to three different forms of ICAM-1 under static conditions, we saw a broad distribution of adhesion types but an excess of 'ca' type in severe malaria (CM and SM other combined, although the majority of 'ca' types were in the CM category (Table S1)). It should be noted that this association did not reach statistical significance ( $p = 0.056$ ). It is possible that this binding signature is linked to pathogenesis, although further studies are required to study this. The 'ca' binding signature is shared with the A4 parasite variant, and the ITO4 line, which was isolated after selection on activated human umbilical vein endothelial cells (HUVEC). In contrast, ItG parasites selected by binding to purified ICAM-1 protein displayed the 'bc' binding signature, which was not prevalent among parasites isolated from children with severe malaria (Figure 3). HUVEC expresses ICAM-1 on TNF stimulation but not CD36 and is used widely as a model of brain sequestration *in vitro* [21,36,59,89]. Thus a binding signature exhibited by parasites isolated from children with severe malaria is similar to that exhibited by a parasite line selected for binding to endothelial cells with a receptor distribution similar to that seen in the brain. However, another parasite line from the IT parent line, ItG, is not associated with severe *falciparum* malaria despite being selected on ICAM-1, implying that the cellular context of the receptor may also be important. The numbers available for this part of the study were limited and further work will be required to confirm this observation.

The number of circulating genotypes in a given sample indicates the extent of parasite diversity and may explain varying adhesion phenotypes observed. This study analysed MSP1 families (MAD20, K1, RO33) and MSP2 families (FC27, IC) to answer this question. We did not see any associations with the number of or type of parasite genotypes and clinical syndromes. A limited parasite diversity as observed in a previous study [90] was seen. Conflicting results between the allelic family present and association with disease severity have been seen in other studies showing MSP2/ IC type dominant in asymptomatic infections [91,92] while others showed an association of MSP2/ FC27 with symptomatic malaria [93]. Our study also observed the predominance of the allelic family MSP1/ K1 as seen in a study in Gabon [94]. Human genotypes like the haemoglobinopathies HbS and HbC are known to be relevant in cytoadherence. A recent study suggested that these polymorphisms can affect the display of PfEMP1 and thereby reduce adhesion [52]. In our study we found only three HbAS carriers, which was too few to draw any conclusions. We further found no evidence of an association between carriage of particular allelic families of *m*sp1 or *m*sp2 and either severity of clinical presentation, or adhesion phenotype.

As with pregnancy-associated malaria, the aim now is to use this information to understand the basis of severe malaria and identify novel approaches to prevention or treatment. This will not be a

simple task (see [4] for a review of this area), due to several factors such as severe malaria consisting of a diverse collection of syndromes and the involvement of multiple receptors producing synergy such as that observed between ICAM-1 and CD36. Indeed the role of other receptors besides ICAM-1 and CD36 should not be discounted in terms of their contribution to disease, for example, gC1qR can act as a receptor for binding to brain microvascular endothelial cell lines [95] but its role in CM is yet to be determined.

In summary, this study has identified significant associations between receptor usage by pediatric clinical isolates and disease severity. We have shown for the first time in African children that parasites isolated from children with UM bind to CD36 at higher densities than parasites from children with severe malaria. Importantly, high density parasite binding to ICAM-1 under flow conditions was significantly associated with cerebral malaria. The findings presented here provide a platform from which to focus efforts on blocking or reversing ICAM-1-mediated adhesion to reduce cerebral malaria as well as a reconsideration of anti-CD36 strategies for controlling severe malaria.

## Supporting Information

**Table S1** Binding signatures for clinical isolates under static conditions. Binding signatures of clinical isolates presented as % binding and coloured codes. K29, % adhesion to ICAM-1<sup>Kilifi</sup>, S22, % adhesion to ICAM-1<sup>S22/A</sup> and column 3, binding signature. Binding is calculated relative to ICAM-1<sup>Reference</sup> as reference standard. The numbers of isolates in SMA  $n = 5$ , CM  $n = 13$ , Severe Malaria-other  $n = 22$  and UM  $n = 32$ .

Found at: doi:10.1371/journal.pone.0014741.s001 (0.08 MB DOC)

**Table S2** Adhesion data for clinical *P. falciparum* isolates under static and flow adhesion assays. Numbers represent number of adherent parasites/mm<sup>2</sup>. (-) no data available.

Found at: doi:10.1371/journal.pone.0014741.s002 (0.14 MB DOC)

**Table S3** Genotype frequencies for ICAM-1, CD36,  $\alpha$ -thalassaemia and HbS. Genotype frequencies for patients studied. HbS, haemoglobin S variant (sickle cell genotype). CD36, point mutation from T to G in the CD36 gene at nucleotide position 188 in exon 10. Numbers represent the number of children that fall into each genotype (wild-type, heterozygous and homozygous). Numbers in parenthesis is given as a percentage of respective genotypes.

Found at: doi:10.1371/journal.pone.0014741.s003 (0.03 MB DOC)

## Acknowledgments

This paper is published with the permission of the Director of KEMRI. We thank the children and guardians for participating in the study, the staff at the peripheral clinics, KEMRI ward and Outpatients Department. We thank Eric Ohuma for statistical support and Joe Smith (SBRI) for his help in setting up the study.

## Author Contributions

Conceived and designed the experiments: AGC. Performed the experiments: LO BRS HO SN ENK JOM AL TS. Analyzed the data: LO BRS HO AGC. Contributed reagents/materials/analysis tools: TNW AL BCU PCB TS AGC. Wrote the paper: LO KM AGC.

## References

- Turner GD, Morrison H, Jones M, Davis TM, Looareesuwan S, et al. (1994) An immunohistochemical study of the pathology of fatal malaria. Evidence for widespread endothelial activation and a potential role for intercellular adhesion molecule-1 in cerebral sequestration. *Am J Pathol* 145: 1057–1069.
- Ho M, White NJ (1999) Molecular mechanisms of cytoadherence in malaria. *Am J Physiol* 276: C1231–1242.
- Miller LH, Baruch DI, Marsh K, Doumbo OK (2002) The pathogenic basis of malaria. *Nature* 415: 673–679.
- Rowe JA, Claessens A, Corrigan RA, Arman M (2009) Adhesion of *Plasmodium falciparum*-infected erythrocytes to human cells: molecular mechanisms and therapeutic implications. *Expert Rev Mol Med* 11: e16.
- Silamut K, Phu NH, Whitty C, Turner GD, Louwrier K, et al. (1999) A quantitative analysis of the microvascular sequestration of malaria parasites in the human brain. *Am J Pathol* 155: 395–410.
- Newbold C, Warn P, Black G, Berendt A, Craig A, et al. (1997) Receptor-specific adhesion and clinical disease in *Plasmodium falciparum*. *Am J Trop Med Hyg* 57: 389–398.
- Rowe A, Obeiro J, Newbold CI, Marsh K (1995) *Plasmodium falciparum* rosetting is associated with malaria severity in Kenya. *Infect Immun* 63: 2323–2326.
- Rowe JA, Rogerson SJ, Raza A, Moulds JM, Kazatchkine MD, et al. (2000) Mapping of the region of complement receptor (CR) 1 required for *Plasmodium falciparum* rosetting and demonstration of the importance of CR1 in rosetting in field isolates. *J Immunol* 165: 6341–6346.
- Horata N, Kalambahehi T, Craig A, Khumsmith S (2009) Sequence variation of P1EMP1-DBLalpha in association with rosette formation in *Plasmodium falciparum* isolates causing severe and uncomplicated malaria. *Malar J* 8: 184.
- Fried M, Duffy PE (1996) Adherence of *Plasmodium falciparum* to chondroitin sulfate A in the human placenta. *Science* 272: 1502–1504.
- Maubert B, Fievet N, Tami G, Boudin C, Deloron P (2000) Cytoadherence of *Plasmodium falciparum*-infected erythrocytes in the human placenta. *Parasite Immunol* 22: 191–199.
- Beeson JG, Duffy PE (2005) The immunology and pathogenesis of malaria during pregnancy. *Curr Top Microbiol Immunol* 297: 187–227.
- Rowe JA, Moulds JM, Newbold CI, Miller LH (1997) P. *falciparum* rosetting mediated by a parasite-variant erythrocyte membrane protein and complement-receptor 1. *Nature* 388: 292–295.
- Smith JD, Craig AG, Kriek N, Hudson-Taylor D, Kyes S, et al. (2000) Identification of a *Plasmodium falciparum* intercellular adhesion molecule-1 binding domain: a parasite adhesion trait implicated in cerebral malaria. *Proc Natl Acad Sci U S A* 97: 1766–1771.
- Buffet PA, Gamain B, Scheid C, Baruch D, Smith JD, et al. (1999) *Plasmodium falciparum* domain mediating adhesion to chondroitin sulfate A: a receptor for human placental infection. *Proc Natl Acad Sci U S A* 96: 12743–12748.
- Reeder JC, Cowman AF, Davern KM, Beeson JG, Thompson JK, et al. (1999) The adhesion of *Plasmodium falciparum*-infected erythrocytes to chondroitin sulfate A is mediated by P. *falciparum* erythrocyte membrane protein 1. *Proc Natl Acad Sci U S A* 96: 5198–5202.
- Chen Q, Heddi A, Barragan A, Fernandez V, Pearce SF, et al. (2000) The semiconserved head structure of *Plasmodium falciparum* erythrocyte membrane protein 1 mediates binding to multiple independent host receptors. *J Exp Med* 192: 1–10.
- Degen R, Weiss N, Beck HP (2000) *Plasmodium falciparum*: cloned and expressed CIDR domains of P1EMP1 bind to chondroitin sulfate A. *Exp Parasitol* 95: 113–121.
- Klein MM, Gittis AG, Su H, Makobongo MO, Moore JM, et al. (2008) The cysteine-rich interdomain region from the highly variable *Plasmodium falciparum* erythrocyte membrane protein-1 exhibits a conserved structure. *PLoS Pathog* 4: e1000147.
- Mo M, Lee HC, Kotaka M, Niang M, Gao X, et al. (2008) The C-terminal segment of the cysteine-rich interdomain of *Plasmodium falciparum* erythrocyte membrane protein 1 determines CD36 binding and elicits antibodies that inhibit adhesion of parasite-infected erythrocytes. *Infect Immun* 76: 1837–1847.
- Berendt AR, Simmons DL, Tansey J, Newbold CI, Marsh K (1989) Intercellular adhesion molecule-1 is an endothelial cell adhesion receptor for *Plasmodium falciparum*. *Nature* 341: 57–59.
- Barnwell JW, Asch AS, Nachman RL, Yamaya M, Aikawa M, et al. (1989) A human 88-kD membrane glycoprotein (CD36) functions in vitro as a receptor for a cytoadherence ligand on *Plasmodium falciparum*-infected erythrocytes. *J Clin Invest* 84: 765–772.
- Ockenhouse CF, Magowan C, Chulay JD (1989) Activation of monocytes and platelets by monoclonal antibodies or malaria-infected erythrocytes binding to the CD36 surface receptor in vitro. *J Clin Invest* 84: 468–475.
- Ho M, Schollaardt T, Niu X, Looareesuwan S, Patel KD, et al. (1998) Characterization of *Plasmodium falciparum*-infected erythrocyte and P-selectin interaction under flow conditions. *Blood* 91: 4803–4809.
- Heddi A, Petterson F, Kai O, Shafi J, Obiero J, et al. (2001) Fresh isolates from children with severe *Plasmodium falciparum* malaria bind to multiple receptors. *Infect Immun* 69: 5849–5856.
- Staalsoe T, Megnekou R, Fievet N, Ricke CH, Zornig HD, et al. (2001) Acquisition and decay of antibodies to pregnancy-associated variant antigens on the surface of *Plasmodium falciparum*-infected erythrocytes that protect against placental parasitemia. *J Infect Dis* 184: 618–626.
- Staalsoe T, Shulman CE, Bulmer JN, Kawuondo K, Marsh K, et al. (2004) Variant surface antigen-specific IgG and protection against clinical consequences of pregnancy-associated *Plasmodium falciparum* malaria. *Lancet* 363: 283–289.
- Feng G, Aitken E, Yosaatmadja F, Kalilani L, Meshnick SR, et al. (2009) Antibodies to variant surface antigens of *Plasmodium falciparum*-infected erythrocytes are associated with protection from treatment failure and the development of anemia in pregnancy. *J Infect Dis* 200: 299–306.
- Dahlbäck M, Rask TS, Andersen PH, Nielsen MA, Ndam NT, et al. (2006) Epitope mapping and topographic analysis of VAR2CSA DBL3X involved in P. *falciparum* placental sequestration. *PLoS Pathog* 2: e124.
- van de Stolpe A, van der Saag PT (1996) Intercellular adhesion molecule-1. *J Mol Med* 74: 13–33.
- Fernandez-Reyes D, Craig AG, Kyes SA, Peshu N, Snow RW, et al. (1997) A high frequency African coding polymorphism in the N-terminal domain of ICAM-1 predisposing to cerebral malaria in Kenya. *Hum Mol Genet* 6: 1357–1360.
- Kun JF, Klabunde J, Lell B, Luckner D, Alpers M, et al. (1999) Association of the ICAM-1 Kilifi mutation with protection against severe malaria in Lambaré, Gabon. *Am J Trop Med Hyg* 61: 776–779.
- Bellamy R, Kwiatkowski D, Hill AV (1998) Absence of an association between intercellular adhesion molecule 1, complement receptor 1 and interleukin 1 receptor antagonist gene polymorphisms and severe malaria in a West African population. *Trans R Soc Trop Med Hyg* 92: 312–316.
- Adams S, Turner GD, Nash GB, Micklem K, Newbold CI, et al. (2000) Differential binding of clonal variants of *Plasmodium falciparum* to allelic forms of intracellular adhesion molecule 1 determined by flow adhesion assay. *Infect Immun* 68: 264–269.
- Craig A, Fernandez-Reyes D, Mesri M, McDowall A, Altieri DC, et al. (2000) A functional analysis of a natural variant of intercellular adhesion molecule-1 (ICAM-1 Kilifi). *Hum Mol Genet* 9: 525–530.
- Gray C, McCormick C, Turner G, Craig A (2003) ICAM-1 can play a major role in mediating P. *falciparum* adhesion to endothelium under flow. *Mol Biochem Parasitol* 128: 187–193.
- Gray C, Craig A (2002) Fibrinogen binding to intercellular adhesion molecule 1: implications for *Plasmodium falciparum* adhesion. *Infect Immun* 70: 3962–3964.
- McGilvray ID, Serghides L, Kapus A, Rotstein OD, Kain KC (2000) Nonopsonic monocyte/macrophage phagocytosis of *Plasmodium falciparum*-parasitized erythrocytes: a role for CD36 in malarial clearance. *Blood* 96: 3231–3240.
- Febbraio M, Hajjar DP, Silverstein RL (2001) CD36: a class B scavenger receptor involved in angiogenesis, atherosclerosis, inflammation, and lipid metabolism. *J Clin Invest* 108: 785–791.
- Greenwalt DE, Lipsky RH, Ockenhouse CF, Ikeda H, Tandon NN, et al. (1992) Membrane glycoprotein CD36: a review of its roles in adherence, signal transduction, and transfusion medicine. *Blood* 80: 1105–1115.
- Rogerson SJ, Tembenu R, Dobaño C, Plitt S, Taylor TE, et al. (1999) Cytoadherence characteristics of *Plasmodium falciparum*-infected erythrocytes from Malawian children with severe and uncomplicated malaria. *Am J Trop Med Hyg* 61: 467–472.
- Chilongola J, Balthazary S, Mpina M, Mhando M, Mbugi E (2009) CD36 deficiency protects against malarial anaemia in children by reducing *Plasmodium falciparum*-infected red blood cell adherence to vascular endothelium. *Trop Med Int Health* 14: 810–816.
- Beeson JG, Rogerson SJ, Cooke BM, Reeder JC, Chai W, et al. (2000) Adhesion of *Plasmodium falciparum*-infected erythrocytes to hyaluronic acid in placental malaria. *Nat Med* 6: 86–90.
- Cooke BM, Berendt AR, Craig AG, MacGregor J, Newbold CI, et al. (1994) Rolling and stationary cytoadhesion of red blood cells parasitized by *Plasmodium falciparum*: separate roles for ICAM-1, CD36 and thrombospondin. *Br J Haematol* 87: 162–170.
- Chakravorty SJ, Craig A (2005) The role of ICAM-1 in *Plasmodium falciparum* cytoadherence. *Eur J Cell Biol* 84: 15–27.
- Aitman TJ, Cooper LD, Norsworthy PJ, Wahid FN, Gray JK, et al. (2000) Malaria susceptibility and CD36 mutation. *Nature* 405: 1015–1016.
- Aidoo M, Terlouw DJ, Kolczak MS, McElroy PD, ter Kuile FO, et al. (2002) Protective effects of the sickle cell gene against malaria morbidity and mortality. *Lancet* 359: 1311–1312.
- Jenkins NE, Mwangi TW, Kortok M, Marsh K, Craig AG, et al. (2005) A polymorphism of intercellular adhesion molecule-1 is associated with a reduced incidence of nonmalarial febrile illness in Kenyan children. *Clin Infect Dis* 41: 1817–1819.
- Pain A, Urban BC, Kai O, Casals-Pascual C, Shafi J, et al. (2001) A non-sense mutation in Cd36 gene is associated with protection from severe malaria. *Lancet* 357: 1502–1503.
- Roberts DJ, Williams TN (2003) Haemoglobinopathies and resistance to malaria. *Redox Rep* 8: 304–310.



51. Cholera R, Brittain NJ, Gillrie MR, Lopera-Mesa TM, Diakité SAS, et al. (2008) Impaired cytoadherence of Plasmodium falciparum-infected erythrocytes containing sickle hemoglobin. *Proc Natl Acad Sci U S A* 105: 991–996.
52. Fairhurst RM, Baruch DI, Brittain NJ, Ostera GR, Wallach JS, et al. (2005) Abnormal display of PfEMP-1 on erythrocytes carrying haemoglobin C may protect against malaria. *Nature* 435: 1117–1121.
53. Bull PC, Lowe BS, Kortok M, Marsh K (1999) Antibody recognition of Plasmodium falciparum erythrocyte surface antigens in Kenya: evidence for rare and prevalent variants. *Infect Immun* 67: 733–739.
54. Molyneux ME, Taylor TE, Wirima JJ, Borgstein A (1989) Clinical features and prognostic indicators in paediatric cerebral malaria: a study of 131 comatose Malawian children. *Q J Med* 71: 441–459.
55. Severe falciparum malaria (2000) World Health Organization, Communicable Diseases Cluster. *Trans R Soc Trop Med Hyg* 94 Suppl 1: S1–90.
56. Marsh K, Forster D, Waruiru C, Mwangi I, Winstanley M, et al. (1995) Indicators of life-threatening malaria in African children. *N Engl J Med* 332: 1399–1404.
57. Marsh K, Snow RW (1997) Host-parasite interaction and morbidity in malaria endemic areas. *Philos Trans R Soc Lond, B, Biol Sci* 352: 1385–1394.
58. Bull PC, Kortok M, Kai O, Ndungu F, Ross A, et al. (2000) Plasmodium falciparum-infected erythrocytes: agglutination by diverse Kenyan plasma is associated with severe disease and young host age. *J Infect Dis* 182: 252–259.
59. Roberts DJ, Craig AG, Berendt AR, Pinches R, Nash G, et al. (1992) Rapid switching to multiple antigenic and adhesive phenotypes in malaria. *Nature* 357: 689–692.
60. Ockenhouse CF, Betageri R, Springer TA, Staunton DE (1992) Plasmodium falciparum-infected erythrocytes bind ICAM-1 at a site distinct from LFA-1, Mac-1, and human rhinovirus. *Cell* 68: 63–69.
61. Trager W, Jensen JB (1976) Human malaria parasites in continuous culture. *Science* 193: 673–675.
62. Tse MT, Chakrabarti K, Gray C, Chitnis CE, Craig A (2004) Divergent binding sites on intercellular adhesion molecule-1 (ICAM-1) for variant Plasmodium falciparum isolates. *Mol Microbiol* 51: 1039–1049.
63. Chong SS, Boehm CD, Higgs DR, Cutting GR (2000) Single-tube multiplex-PCR screen for common deletional determinants of alpha-thalassemia. *Blood* 95: 360–362.
64. Waterfall CM, Cobb BD (2001) Single tube genotyping of sickle cell anaemia using PCR-based SNP analysis. *Nucleic Acids Res* 29: E119.
65. Liljander A, Wiklund L, Falk N, Kweku M, Mårtensson A, et al. (2009) Optimization and validation of multi-coloured capillary electrophoresis for genotyping of Plasmodium falciparum merozoite surface proteins (msp1 and 2). *Malar J* 8: 78.
66. Reeder JC, Rogerson SJ, al-Yaman F, Anders RF, Coppel RL, et al. (1994) Diversity of agglutinating phenotype, cytoadherence, and rosette-forming characteristics of Plasmodium falciparum isolates from Papua New Guinean children. *Am J Trop Med Hyg* 51: 45–55.
67. Blomqvist K, Normark J, Nilsson D, Ribacke U, Orikiriza J, et al. (2010) var gene transcription dynamics in Plasmodium falciparum patient isolates. *Mol Biochem Parasitol* 170: 74–83.
68. Chaiyaroj SC, Coppel RL, Novakovic S, Brown GV (1994) Multiple ligands for cytoadherence can be present simultaneously on the surface of Plasmodium falciparum-infected erythrocytes. *Proc Natl Acad Sci U S A* 91: 10805–10808.
69. Cojean S, Jafari-Guemouri S, Le Bras J, Durand R (2008) Cytoadherence characteristics to endothelial receptors ICAM-1 and CD36 of Plasmodium falciparum populations from severe and uncomplicated malaria cases. *Parasite* 15: 163–169.
70. Marsh K, Marsh VM, Brown J, Whittle HC, Greenwood BM (1988) Plasmodium falciparum: the behavior of clinical isolates in an in vitro model of infected red blood cell sequestration. *Exp Parasitol* 65: 202–208.
71. Kyriacou HM, Stone GN, Challis RJ, Raza A, Lyke KE, et al. (2006) Differential var gene transcription in Plasmodium falciparum isolates from patients with cerebral malaria compared to hyperparasitaemia. *Mol Biochem Parasitol* 150: 211–218.
72. Ho M, Singh B, Looareesuwan S, Davis TM, Bunnag D, et al. (1991) Clinical correlates of in vitro Plasmodium falciparum cytoadherence. *Infect Immun* 59: 873–878.
73. Meerman L, Ord R, Bousema JT, van Niekerk M, Osman E, et al. (2005) Carriage of chloroquine-resistant parasites and delay of effective treatment increase the risk of severe malaria in Gambian children. *J Infect Dis* 192: 1651–1657.
74. Akech SO, Hassall O, Pamba A, Idro R, Williams TN, et al. (2008) Survival and haematological recovery of children with severe malaria transfused in accordance to WHO guidelines in Kilifi, Kenya. *Malar J* 7: 256.
75. Serghides L, Kain KC (2001) Peroxisome proliferator-activated receptor gamma-retinoid X receptor agonists increase CD36-dependent phagocytosis of Plasmodium falciparum-parasitized erythrocytes and decrease malaria-induced TNF-alpha secretion by monocytes/macrophages. *J Immunol* 166: 6742–6748.
76. Smith TG, Serghides L, Patel SN, Febbraio M, Silverstein RL, et al. (2003) CD36-mediated nonopsonic phagocytosis of erythrocytes infected with stage I and II gametocytes of Plasmodium falciparum. *Infect Immun* 71: 393–400.
77. Urban BC, Ferguson DJ, Pain A, Willcox N, Plebanski M, et al. (1999) Plasmodium falciparum-infected erythrocytes modulate the maturation of dendritic cells. *Nature* 400: 73–77.
78. Elliott SR, Spurck TP, Dodin JM, Maier AG, Voss TS, et al. (2007) Inhibition of dendritic cell maturation by malaria is dose dependent and does not require Plasmodium falciparum erythrocyte membrane protein 1. *Infect Immun* 75: 3621–3632.
79. Calis JCJ, Phiri KS, Faragher EB, Brabin BJ, Bates I, et al. (2008) Severe anemia in Malawian children. *N Engl J Med* 358: 888–899.
80. Pradhan P (2009) Malarial anaemia and nitric oxide induced megaloblastic anaemia: a review on the causes of malarial anaemia. *J Vector Borne Dis* 46: 100–108.
81. Snow RW, Omumbo JA, Lowe B, Molyneux CS, Obiero JO, et al. (1997) Relation between severe malaria morbidity in children and level of Plasmodium falciparum transmission in Africa. *Lancet* 349: 1650–1654.
82. Marsh K, Snow RW (1999) Malaria transmission and morbidity. *Parasitologia* 41: 241–246.
83. O'Meara WP, Bejon P, Mwangi TW, Okiro EA, Peshu N, et al. (2008) Effect of a fall in malaria transmission on morbidity and mortality in Kilifi, Kenya. *Lancet* 372: 1555–1562.
84. Veenemans J, Andang'o PEA, Mbugi EV, Kraaijenhagen RJ, Mwaniki DL, et al. (2008) Alpha+ thalassemia protects against anaemia associated with asymptomatic malaria: evidence from community-based surveys in Tanzania and Kenya. *J Infect Dis* 198: 401–408.
85. Waitumbi JN, Opollo MO, Muga RO, Misore AO, Stoute JA (2000) Red cell surface changes and erythrophagocytosis in children with severe plasmodium falciparum anaemia. *Blood* 95: 1481–1486.
86. Montgomery J, Mphande FA, Berriman M, Pain A, Rogerson SJ, et al. (2007) Differential var gene expression in the organs of patients dying of falciparum malaria. *Mol Microbiol* 65: 959–967.
87. Kolatkar PR, Bella J, Olson NH, Bator CM, Baker TS, et al. (1999) Structural studies of two rhinovirus serotypes complexed with fragments of their cellular receptor. *EMBO J* 18: 6249–6259.
88. Xiao C, Tuthill TJ, Bator Kelly CM, Challinor LJ, Chipman PR, et al. (2004) Discrimination among rhinovirus serotypes for a variant ICAM-1 receptor molecule. *J Virol* 78: 10034–10044.
89. McCormick CJ, Craig A, Roberts D, Newbold CI, Berendt AR (1997) Intercellular adhesion molecule-1 and CD36 synergize to mediate adherence of Plasmodium falciparum-infected erythrocytes to cultured human microvascular endothelial cells. *J Clin Invest* 100: 2521–2529.
90. Färnert A, Williams TN, Mwangi TW, Ehlin A, Fegan G, et al. (2009) Transmission-dependent tolerance to multiclonal Plasmodium falciparum infection. *J Infect Dis* 200: 1166–1175.
91. Färnert A, Rooth I, Svensson, Snounou G, Björkman A (1999) Complexity of Plasmodium falciparum infections is consistent over time and protects against clinical disease in Tanzanian children. *J Infect Dis* 179: 989–995.
92. al-Yaman F, Genton B, Taraika J, Anders R, Alpers MP (1997) Cellular immunity to merozoite surface protein 2 (FC27 and 3D7) in Papua New Guinean children. Temporal variation and relation to clinical and parasitological status. *Parasite Immunol* 19: 207–214.
93. Engelbrecht F, Felger I, Genton B, Alpers M, Beck HP (1995) Plasmodium falciparum: malaria morbidity is associated with specific merozoite surface antigen 2 genotypes. *Exp Parasitol* 81: 90–96.
94. Touré FS, Ouwe-Missi-Oukem-Boyer O, Mezui-Mc-Ndong J, Ndong-Atome GR, Bisvigou U, et al. (2007) Cytoadherence and genotype of Plasmodium falciparum strains from symptomatic children in Franceville, southeastern Gabon. *Clin Med Res* 5: 106–113.
95. Biswas AK, Hafiz A, Banerjee B, Kim KS, Datta K, et al. (2007) Plasmodium falciparum uses gC1qR/HABP1/p32 as a receptor to bind to vascular endothelium and for platelet-mediated clumping. *PLoS Pathog* 3: 1271–1280.
